# Supplementary material
Source: bioRxiv or medRxiv preprint supplement (https://www.medrxiv.org/highwire/filestream/69773/field_highwire_adjunct_files/1/19010140-2.pdf)
Supplement: Supplementary file [file 19010140-2.pdf]

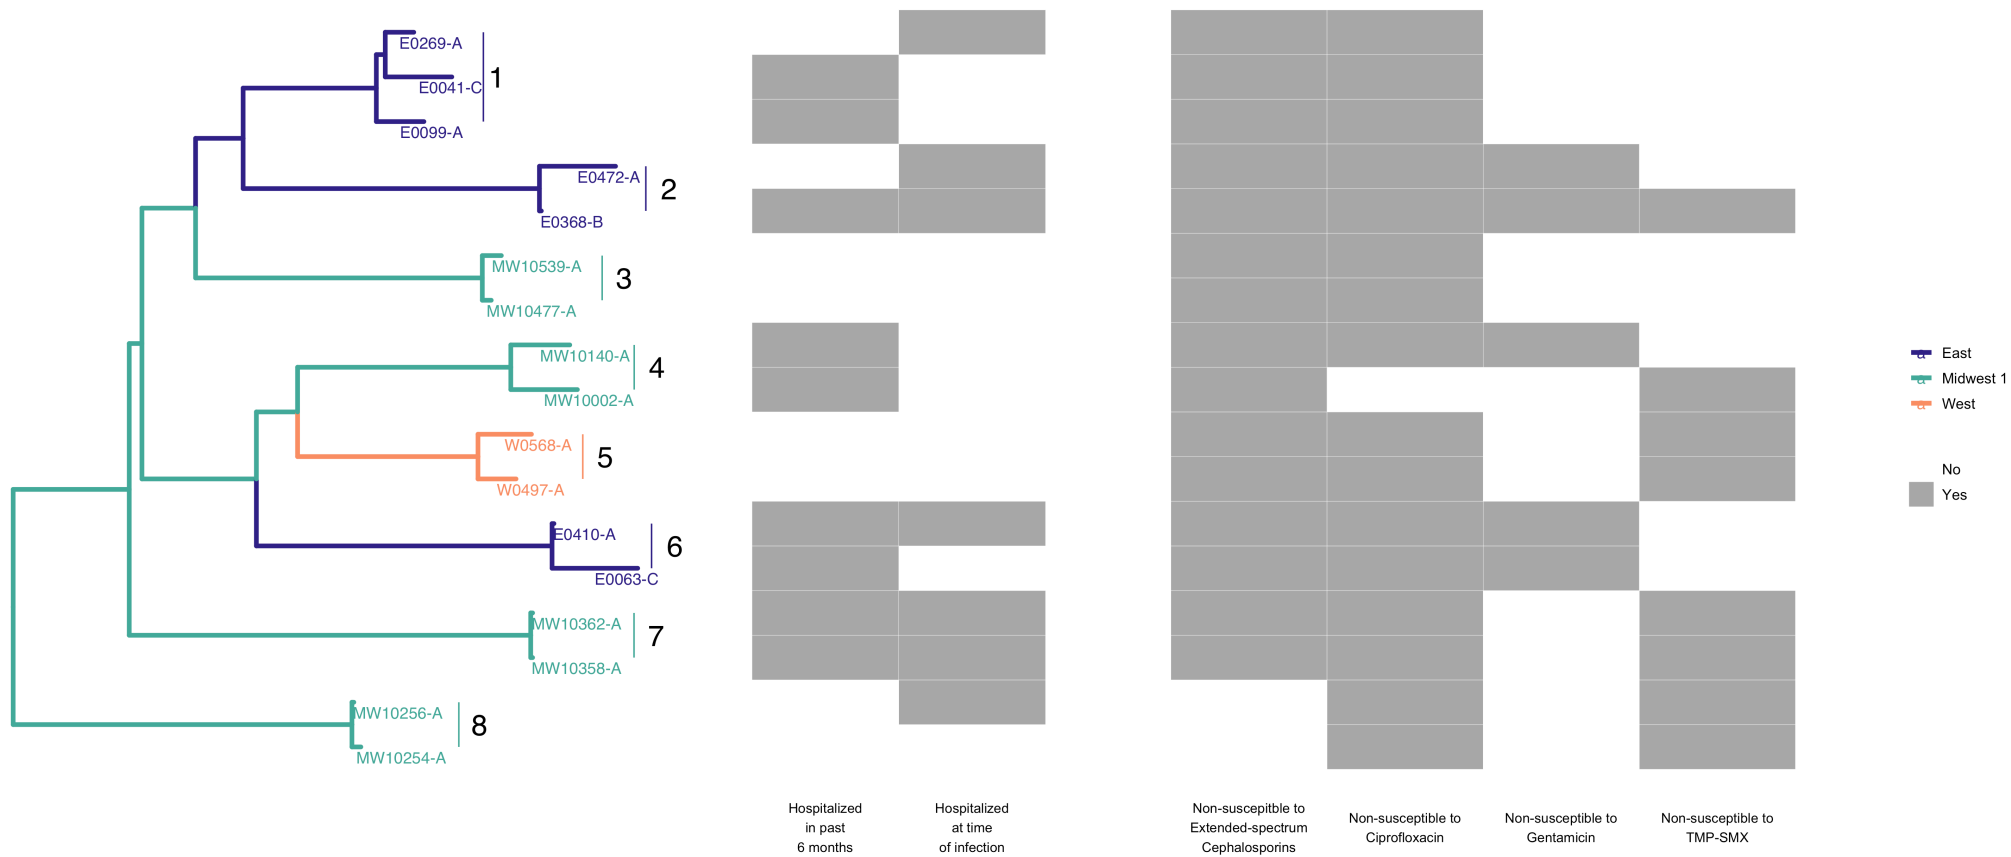

Supplementary Figure 2: Phylogeny of 8 identified putative transmission clusters colored by study site. Heatmap to the right of the phylogeny shows the presence or absence of selected patient characteristics and antibiotic susceptibilities.
